# Supplementary material
Source: PubMed Central journal article supplement (PMC2851831)
Supplement: NIHMS174216-supplement-2.pdf [file NIHMS174216-supplement-2.pdf]

**Supplemental Information.**

**Double Holliday Junctions are Intermediates of DNA Break Repair**

**Malgorzata Bzymek, Nathaniel H. Thayer, Steve D. Oh, Nancy Kleckner and Neil Hunter.**

Seven figures and one table.

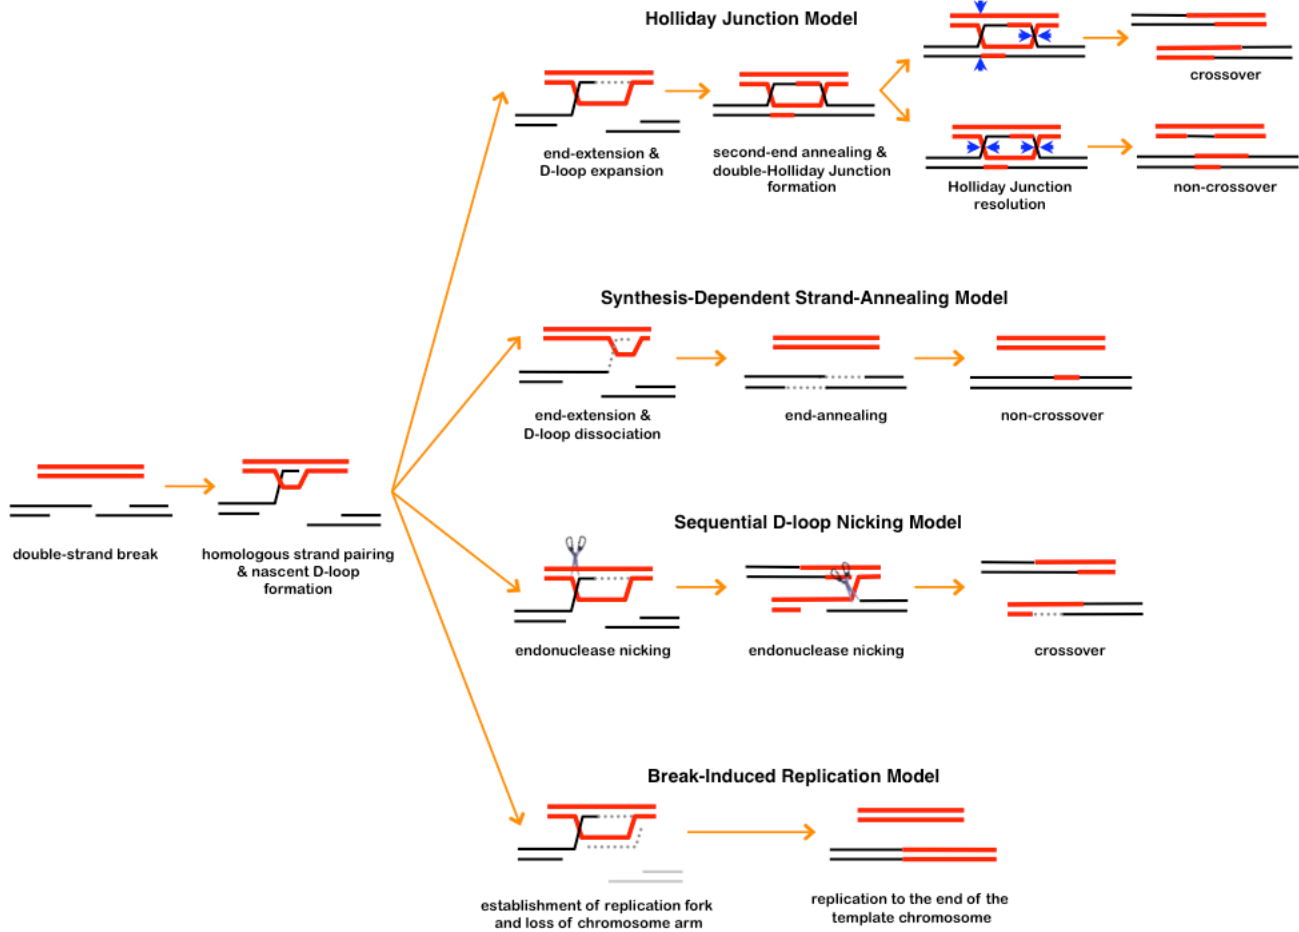

**Supplemental Figure S1.** Pathways of DSB-Repair by Homologous recombination<sup>1-9</sup>.

The major models for the repair DNA double-strand-breaks (DSBs) by homologous recombination are shown. Initiation occurs by DSB formation and nuclease-mediated resection of the 5'-strands to form long, single-stranded tails. Nucleoprotein filaments of ssDNA and RecA-like proteins then assemble and catalyze homologous pairing and DNA strand-exchange with a template chromosome. Nascent DNA is subsequently synthesized from the invading 3'-end. The various repair pathways differentiate after this step. The canonical "DSB-Repair" model<sup>2</sup> designated here as the, "Holliday Junction Model", uniquely posits that double-Holliday Junctions (dHJs) are central intermediates in the repair of DNA double-strand-breaks (DSBs). In this study, dHJs are identified *in vivo* as intermediates of DSB-repair in mitotically cycling cells. Dashed lines indicate nascent DNA. Blue arrowheads indicate nucleolytic incision of Holliday Junctions. D-loop, displacement loop.

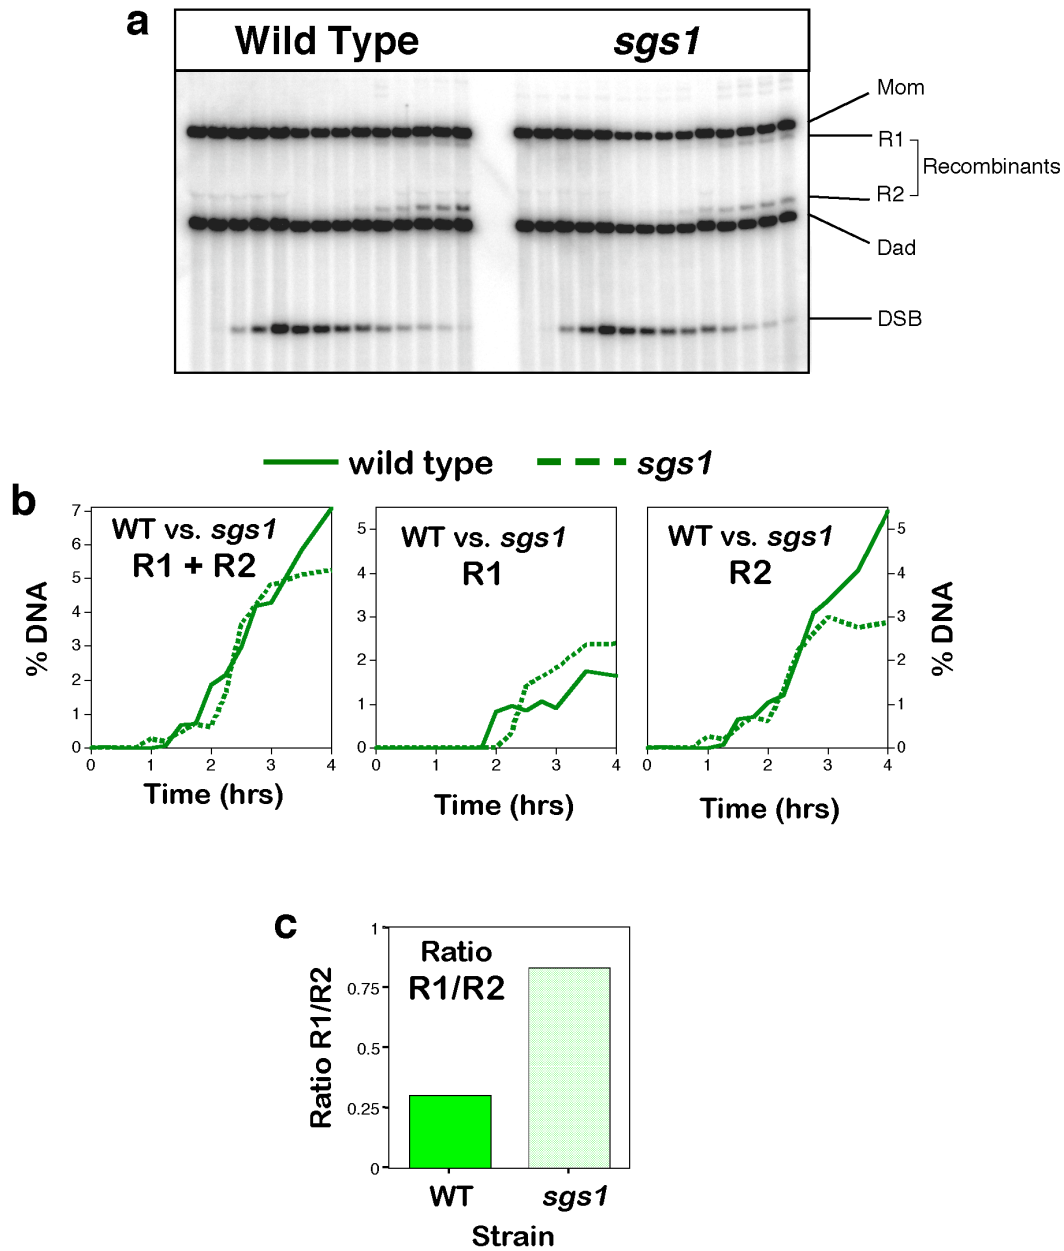

**Supplemental Figure S2.** Analysis of recombinants in wild-type and *sgs1* cells.

The *sgs1* allele used in this study was *sgs1-ΔC795::hphMX4* (see online **Methods**).

**a**, Images of 1D gels hybridized with Probe 4 showing time-course analysis of mitotic DSB repair in wild-type and *sgs1-ΔC795* cells. Samples were digested with *Xho*I as in **Fig. 1b**.

**b**, Quantitation of the two recombinant bands (R1+R2, R1 and R2) in wild-type and *sgs1-ΔC795* cells.

**c**, Final R1:R2 ratios in wild-type and *sgs1-ΔC795* cells.

If recombinant bands R1 and R2 arise exclusively from reciprocal inter-homolog crossing-over in the *HIS4LEU2-SceI* system, then the ratio of R1:R2 should equal one. However, in wild-type cells, the smaller recombinant band, R2, is greatly overrepresented relative to the larger R1. This R2 bias is likely caused by gene conversion of the most DSB-proximal *XhoI* site (specifically, the recipient “Mom” chromosome acquires the *XhoI* site located in *LEU2*; see **Fig. 1a**). Gene conversion (occurring without associated crossing-over) undoubtedly accounts for the difference between R1 and R2 (3.8%) in wild-type cells. The remaining 3.2% recombinants could be solely due to *bona fide* reciprocal crossing-over, but we cannot rule out the possibility that non-crossover gene conversion also contributes to these products, i.e. 3.2% is a *maximum* estimate of crossover levels in wild-type cells at the *HIS4LEU2-SceI* locus.

Thus, “Recombinants” in the *HIS4LEU2-SceI* system represent both crossover and non-crossover products of DSB-repair between homologs. This is in contrast to meiotic recombination at *HIS4LEU2*, where recombinants R1 and R2 accurately report interhomolog crossovers: the ratio of R1:R2 = 1 and R1+R2 matches crossover levels determined by genetic analysis<sup>10</sup>.

Our analysis of recombinants in *sgs1* cells is consistent with the interpretation above. *sgs1* mutation has two independent effects on mitotic DSB-repair, reducing the extent of DSB resection (5'-strand degradation) and increasing the fraction of DSBs that are repaired with an associated crossover<sup>11-13</sup>. Reduced resection is expected to reduce the gene conversion frequency of DSB-proximal *XhoI* sites and thus the level of R2 recombinants. Consistently, the level of R2 recombinant is reduced by about half in *sgs1-ΔC795* cells (from 5.4% in wild-type to 2.9%). In contrast, the level of R1 is increased in *sgs1-ΔC795* cells relative to wild type (2.4% vs 1.6%), consistent with an increase in the fraction of DSBs that are repaired with a crossover outcome.

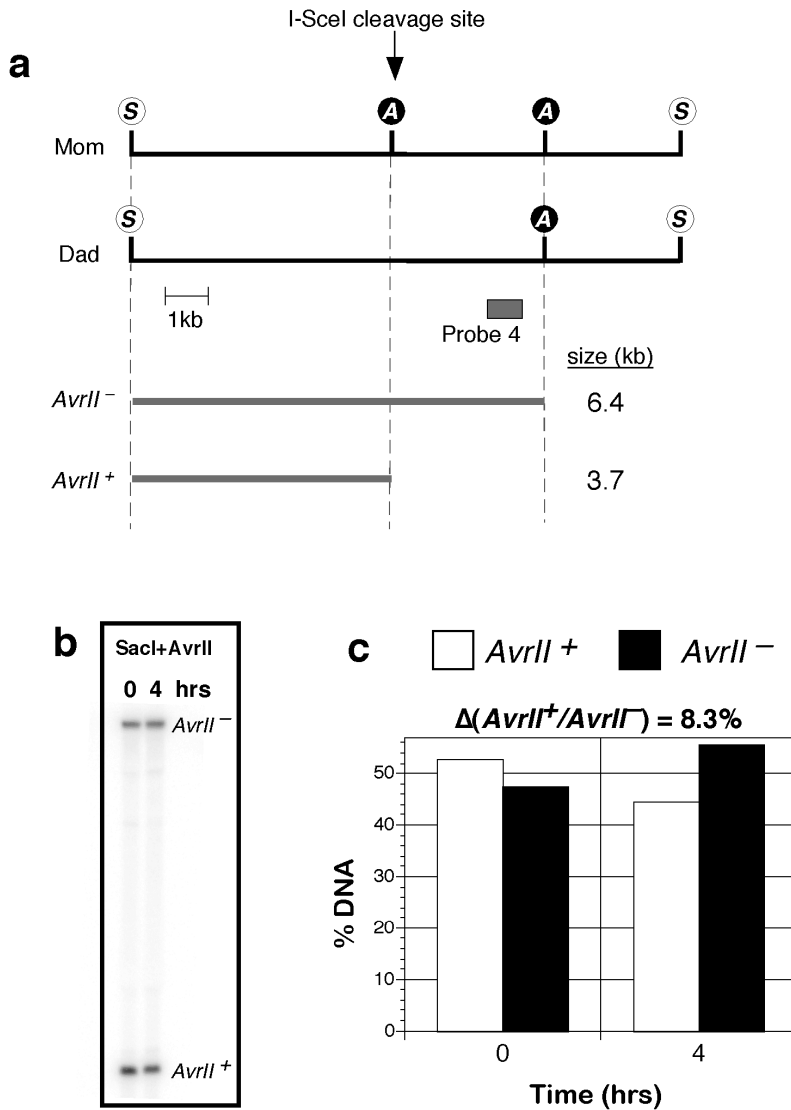

**Supplemental Figure S3.** Measurement of Interhomolog Recombination Levels at *HIS4LEU2-SceI*.

**a**, Map of the *HIS4LEU2-SceI* locus showing restriction sites used to analyze gene-conversion of a polymorphic *AvrII* site. This site is located directly at the DSB site and should always be converted during inter-homolog repair. Lollipops indicate restriction sites: S, *SacI*; A, *AvrII*.

**b**, 1D gel Southern analysis of *SacI* + *AvrII* digested genomic DNA from the zero and four hour time-points of the wild-type time-course shown in **Figs. 1 and 4**.

**c**, Quantitation of the Southern image in **b** shows that 8.3% of *AvrII* sites are converted during DSB-repair in wild-type cells. Correcting for the fact that crossing-over produces two recombinant molecules per DSB, we can estimate that inter-homolog DSB-repair at *HIS4LEU2-SceI* in wild-type cells is

associated with crossing-over ~19% of the time (1.6% R1 recombinants/8.3% total interhomolog recombinants). This is likely an overestimation, for the reasons discussed in **Fig. S2**.

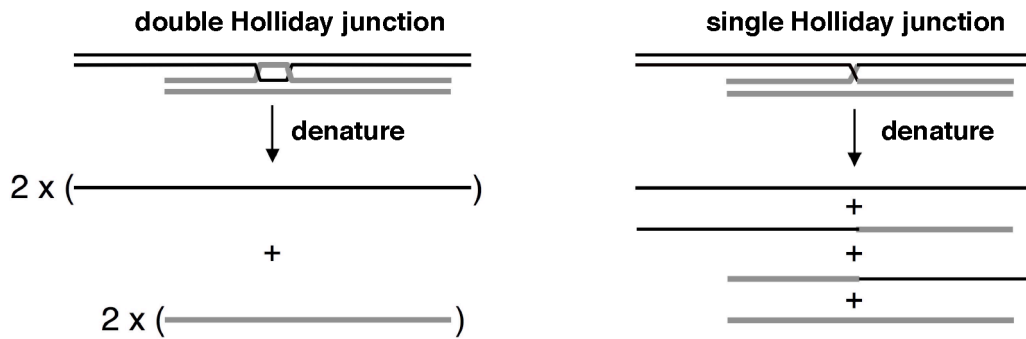

**Supplemental Figure S4.** Strand compositions of double-Holliday junctions and single-Holliday junctions formed between polymorphic homologous chromosomes (see analysis in **Fig. 3d**).

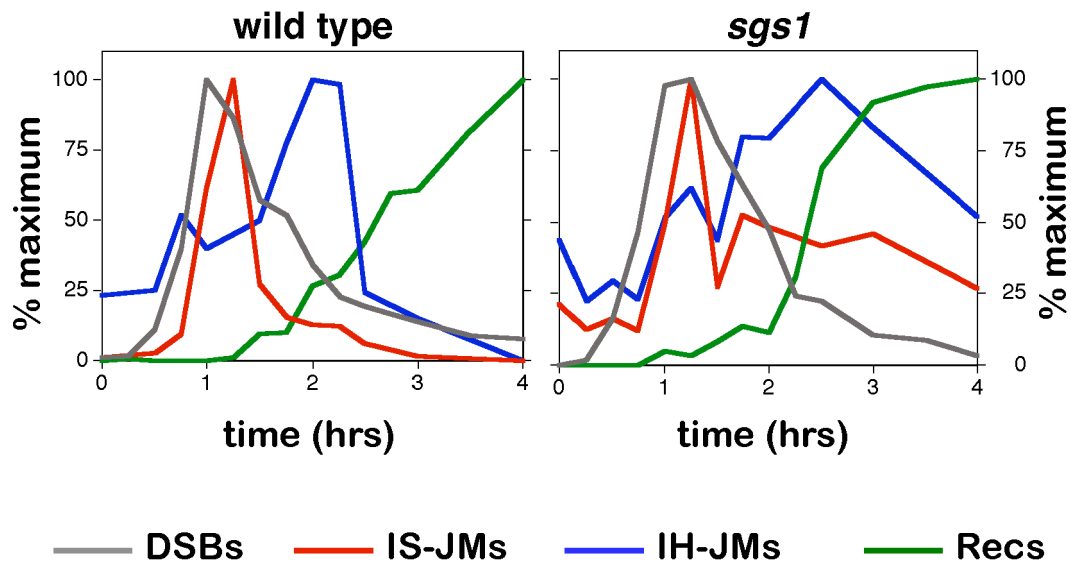

**Supplemental Figure S5.** Timing of DSB-repair intermediates in wild-type and *sgs1* cells.

DSBs, JMs and Recs are expressed as percent of maximum values against time after DSB induction.

Data are from the experiments shown in **Fig 4**. In these graphs, “Recs” represents R1+R2 (see **Fig. 1**).

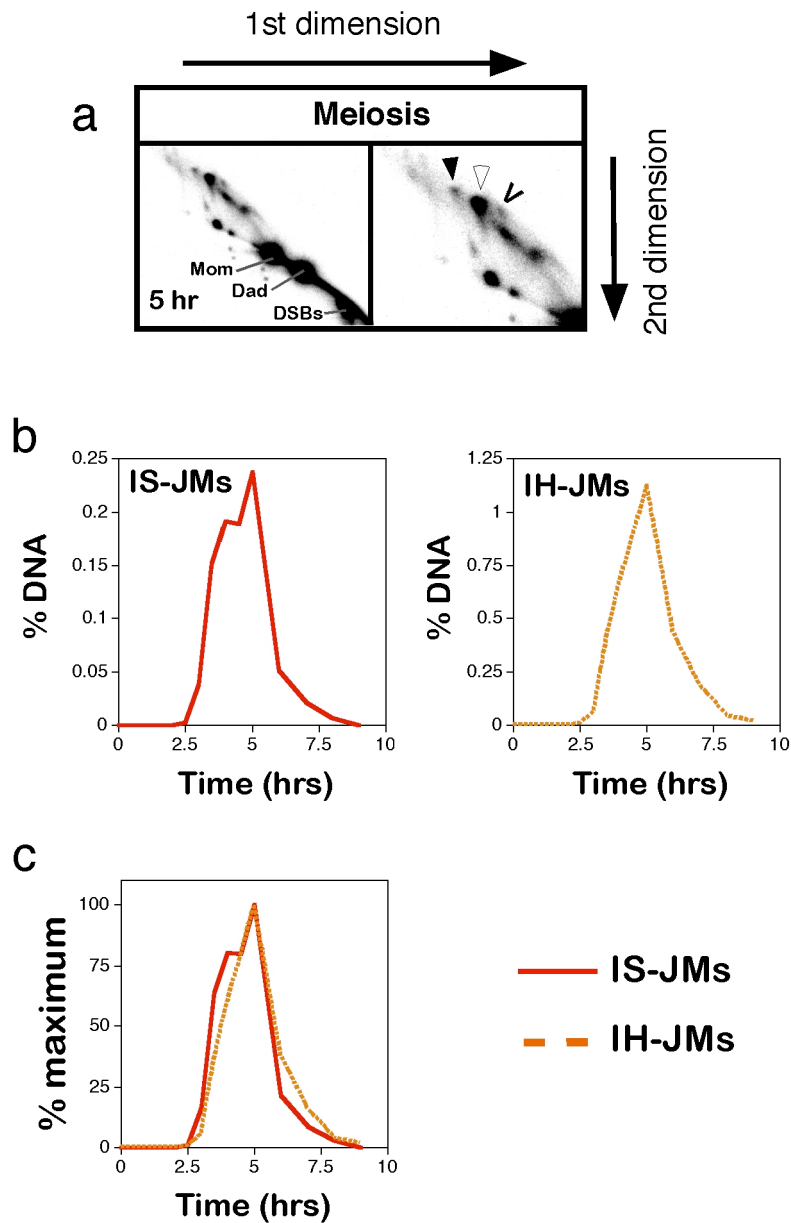

**Supplemental Figure S6.** JM Levels and Timing During Meiotic Recombination.

**a**, Image of native/native 2D gel hybridized with Probe 4 showing JMs formed at *HIS4LEU2* during meiosis. Right-hand-side panel shows a blow-up of the JM region. Arrowheads indicate JM species corresponding to those detected during mitotic DSB-repair (see **Figures 2** and **3**): black arrowhead, Mom+Mom intersister-JM; white arrowhead; Mom+Dad inter-homolog-JM; caret, Dad+Dad intersister-JM. The other prominent JM species detected during meiosis are Single-End Invasions (SEIs), which

correspond to the invasion of a homolog by only one DSB-end<sup>2</sup>. Discrete SEI-like signals were not detected during mitotic DSB-repair (see **Figure 2**).

**b**, Quantitation of meiotic inter-sister and inter-homolog JMs versus time after induction of meiosis via transfer to sporulation media.

**c**, Relative timing of inter-sister and inter-homolog JMs during. JMs are expressed as percent of maximum values against time following transfer to sporulation media.

Methods for analyzing meiotic recombination intermediates at the *HIS4LEU2* locus have been described<sup>14</sup>.



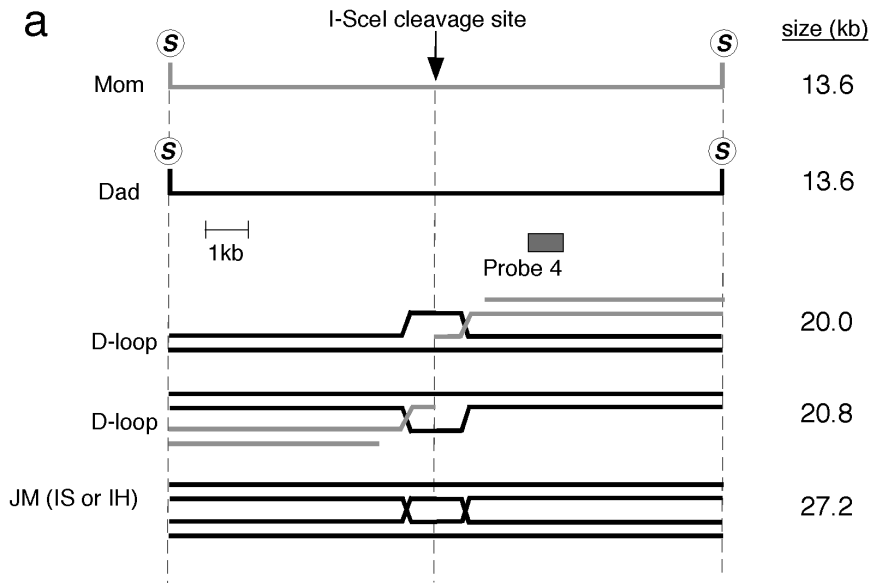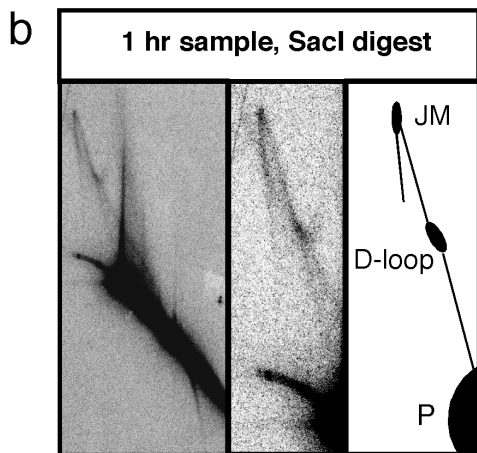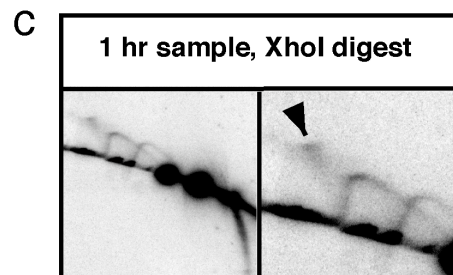

**Supplemental Figure S7. Recovery of JMs at *HIS4LEU2-Scel*.**

**a**, Map of the *HIS4LEU2-Scel* locus showing flanking *SacI* restriction sites and expected sizes of recombination intermediates formed between the corresponding *SacI* fragments.

**b**, Images of native/native 2D gel analysis of *SacI* digested DNA sample taken 1 hr after DSB-induction.

The middle panel shows a magnification of the JM region and the right-hand panel is an interpretation of this image. P, parental *SacI* fragments; D-loop, putative displacement loop intermediates; JM, Joint Molecules (inter-homolog and inter-sister species are not distinguished by *SacI* digestion).

**c**, Images of native/native 2D gel analysis of *Xho*I digested DNA from the same sample as in **b**. The JM region is magnified in the right-hand panel and a black arrowhead highlights the inter-sister JM species. JM levels measured in **b** and **c** are 0.15% and 0.14% respectively. Thus, JMs are efficiently recovered within the *Xho*I fragments used in this study, i.e. JMs do not migrate beyond the *Xho*I sites in significant numbers.

**Table S1. Strains used in this study.**

| Strain<br>(description)                        | Genotype*                                                                                                                                                           |
|------------------------------------------------|---------------------------------------------------------------------------------------------------------------------------------------------------------------------|
| NHY 53<br>(haploid precursor)                  | <i>MATa leu2::hisG ho::hisG ura3Δ(sma-pst)</i>                                                                                                                      |
| NHY 56<br>(haploid precursor)                  | <i>MATα leu2::hisG ho::hisG ura3Δ(sma-pst)</i>                                                                                                                      |
| MBY 249<br>(diploid, DSB on Dad)               | <u><i>MATa HIS4::LEU2"mom" lys2::URA3-pGAL1/10-SCEI</i></u><br><i>MATα his4-X::LEU2"dad"(I-SceI) lys2::URA3-pGAL1/10-SCEI</i>                                       |
| MBY 506<br>(haploid, DSB on Mom)               | <i>MATa HIS4::LEU2"mom"(I-SceI) lys2::URA3-pGAL1/10-SCEI</i>                                                                                                        |
| MBY 514<br>(diploid, DSB on Mom)               | <u><i>MATa HIS4::LEU2"mom"(I-SceI) lys2::URA3-pGAL1/10-SCEI</i></u><br><i>MATα his4-X::LEU2"dad" lys2::URA3-pGAL1/10-SCEI</i>                                       |
| MBY 529<br>( <i>rad51</i> diploid, DSB on Mom) | <u><i>MATa HIS4::LEU2"mom"(I-SceI) lys2::URA3-pGAL1/10-SCEI rad51Δ::hisG</i></u><br><i>MATα his4-X::LEU2"dad" lys2::URA3-pGAL1/10-SCEI rad51Δ::hisG</i>             |
| NHY 1876<br>( <i>sgs1</i> diploid, DSB on Mom) | <u><i>MATa HIS4::LEU2"mom"(I-SceI) lys2::URA3-pGAL1/10-SCEI sgs1-ΔC795::hphMX4</i></u><br><i>MATα his4-X::LEU2"dad" lys2::URA3-pGAL1/10-SCEI sgs1-ΔC795::hphMX4</i> |

\*All strains are homozygous for the mutations *leu2::hisG*, *ho::hisG* and *ura3Δ(sma-pst)*.

## References

- 1 Resnick, M.A., The repair of double-strand breaks in DNA; a model involving recombination. *J Theor Biol* 59 (1), 97-106 (1976).
- 2 Szostak, J.W., Orr-Weaver, T.L., Rothstein, R.J., & Stahl, F.W., The double-strand-break repair model for recombination. *Cell* 33 (1), 25-35 (1983).
- 3 Nassif, N., Penney, J., Pal, S., Engels, W.R., & Gloor, G.B., Efficient copying of nonhomologous sequences from ectopic sites via P-element-induced gap repair. *Molecular and cellular biology* 14 (3), 1613-1625 (1994).
- 4 Niedernhofer, L.J. *et al.*, The structure-specific endonuclease Ercc1-Xpf is required for targeted gene replacement in embryonic stem cells. *The EMBO journal* 20 (22), 6540-6549 (2001).
- 5 Osman, F., Dixon, J., Doe, C.L., & Whitby, M.C., Generating crossovers by resolution of nicked Holliday junctions: a role for Mus81-Eme1 in meiosis. *Mol Cell* 12 (3), 761-774 (2003).
- 6 Paques, F. & Haber, J.E., Multiple pathways of recombination induced by double-strand breaks in *Saccharomyces cerevisiae*. *Microbiol Mol Biol Rev* 63 (2), 349-404 (1999).
- 7 Heyer, W.D., Ehmsen, K.T., & Solinger, J.A., Holliday junctions in the eukaryotic nucleus: resolution in sight? *Trends Biochem Sci* 28 (10), 548-557 (2003).
- 8 Mosig, G., Relationship of T4 DNA replication and recombination.

In *Bacteriophage T4*, edited by C.K. Mathews, E.M. Kutter, G. Mosig, & P.B. Berg (American Society for Microbiology, Washington D.C., 1983), pp. 120-130.

- 9 Llorente, B., Smith, C.E., & Symington, L.S., Break-induced replication: what is it and what is it for? *Cell Cycle* 7 (7), 859-864 (2008).
- 10 Oh, S.D. *et al.*, BLM ortholog, Sgs1, prevents aberrant crossing-over by suppressing formation of multichromatid joint molecules. *Cell* 130 (2), 259-272 (2007).
- 11 Ira, G., Malkova, A., Liberi, G., Foiani, M., & Haber, J.E., Srs2 and Sgs1-Top3 suppress crossovers during double-strand break repair in yeast. *Cell* 115 (4), 401-411 (2003).
- 12 Zhu, Z., Chung, W.H., Shim, E.Y., Lee, S.E., & Ira, G., Sgs1 helicase and two nucleases Dna2 and Exo1 resect DNA double-strand break ends. *Cell* 134 (6), 981-994 (2008).
- 13 Mimitou, E.P. & Symington, L.S., Sae2, Exo1 and Sgs1 collaborate in DNA double-strand break processing. *Nature* 455 (7214), 770-774 (2008).
- 14 Oh, S.D., Jessop, L., Lao, J.P., Lichten, M.J., & Hunter, N.H., Stabilization and Electrophoretic Analysis of Meiotic Recombination Intermediates. in *Methods in Molecular Biology, Meiosis: Molecular and Genetic Methods*, edited by S. Keeney (Humana Press, New York, 2009), pp. 209-234.
